# Supplementary material
Source: publisher site journal article supplement (https://www.dovepress.com/article/259770)
Supplement: Supplementary file 1 [file get_supplementary_file.php]

**Supplemental Figure 1: Participant flowchart**

**
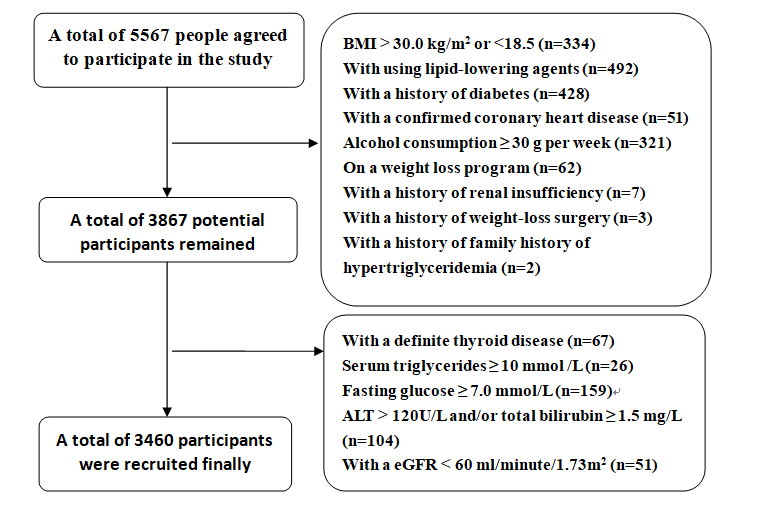
**

**Supplementary table** Spearman correlation between WTI and other anthropometric indices

| Indices | Women (n=1465) | | | | |  | Men (n=1995) | | | |
| --- | --- | --- | --- | --- | --- | --- | --- | --- | --- | --- |
| Coefficient | | *P value* | | |  | Coefficient | | *P value* |
| TyG | | 0.984 | | < 0.001 |  | | | 0.979 | < 0.001 | |
| BMI (kg/m2) | | 0.485 | | < 0.001 |  | | | 0.371 | < 0.001 | |
| WC (cm) | | 0.497 | | < 0.001 |  | | | 0.363 | < 0.001 | |
| WHR | | 0.499 | | < 0.001 |  | | | 0.367 | < 0.001 | |
| WHtR | | 0.456 | | < 0.001 |  | | | 0.334 | < 0.001 | |
| BMI, body mass index; WC, waist circumference; WHR, waist-to-hip ratio; WHtR, waist-to-height ratio; TyG, triglyceride glucose index; WTI, waist-triglyceride index; HW, hypertriglyceridemic waist | | | | | | | | | | |

| **Supplementary Figure 2** Receiver operating characteristic curves of waist-triglyceride index and other indicators used to predict the presence of metabolic syndrome in women |
| --- |


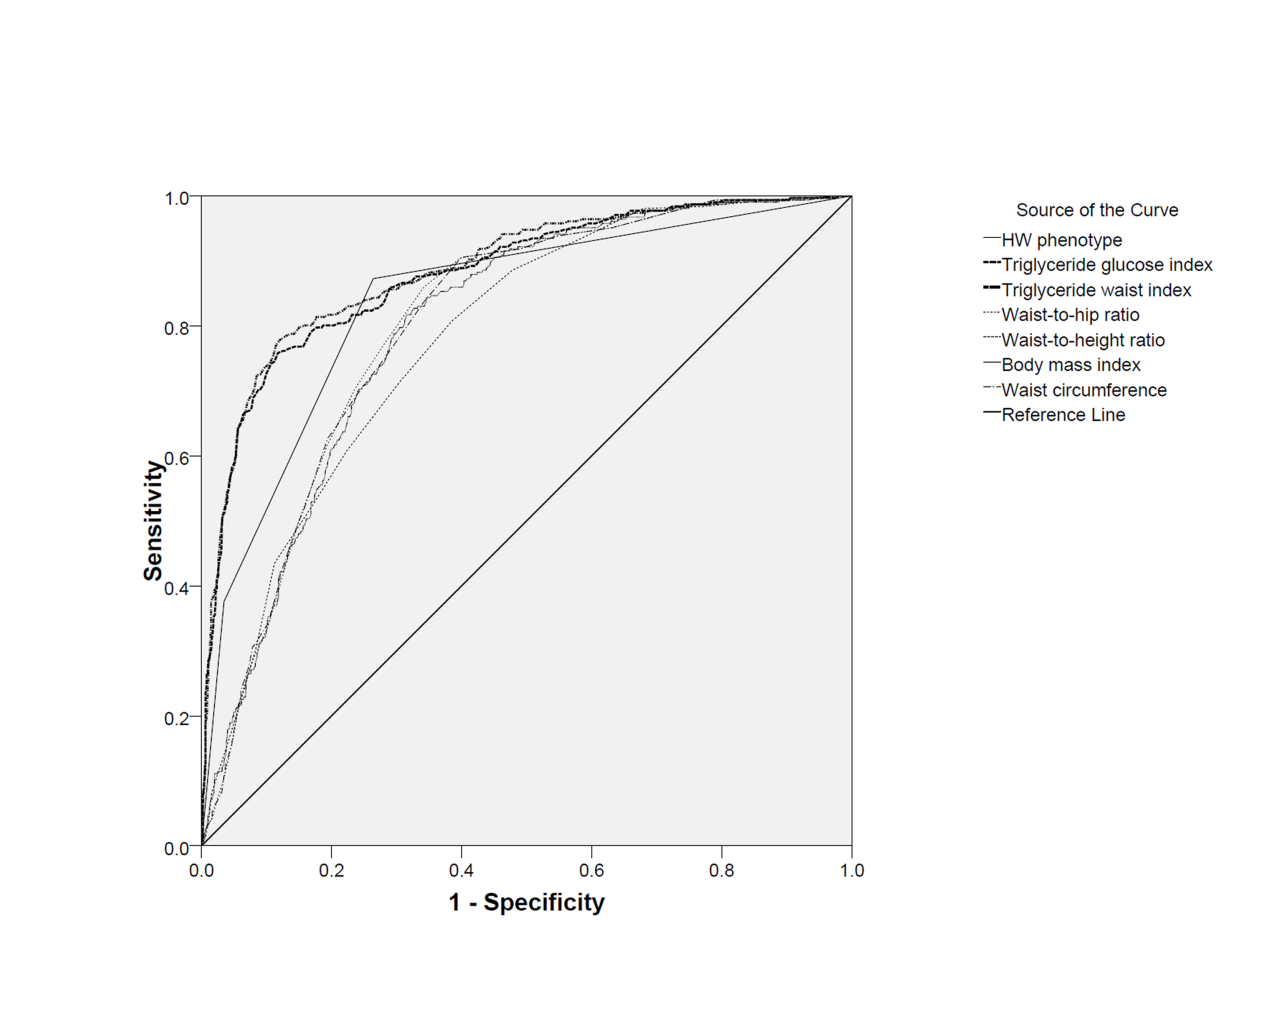


**Supplementary Figure 3** Receiver operating characteristic curves of waist-triglyceride index and other indicators used to predict the presence of metabolic syndrome in men

**
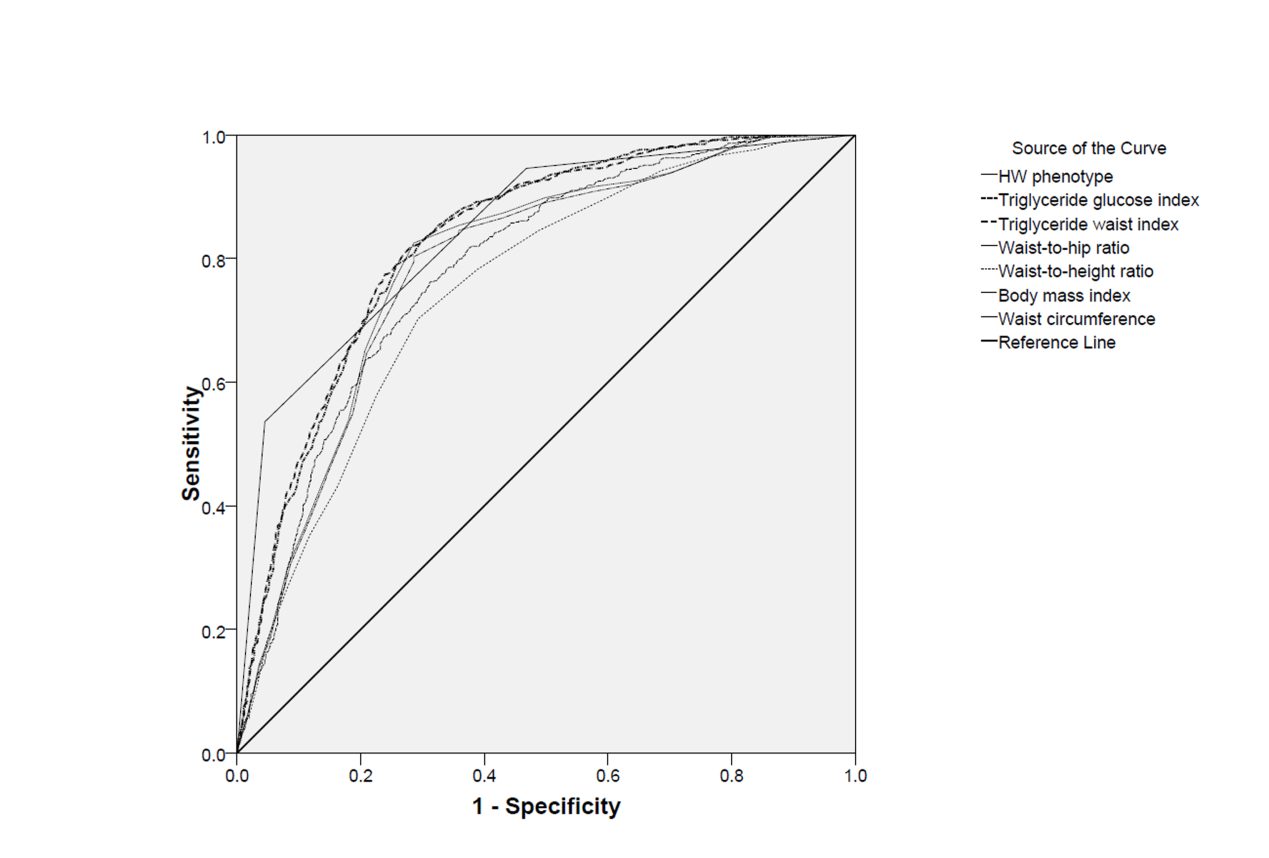
**
